# Supplementary material for: Engineering hydrophobic and electrostatic interactions for selective inactivation of bacteriophages by mixed-ligand nanoparticles
Source: Royal Society of Chemistry journal article supplement (doi:10.1039/d5nr00612k), 2025-01-01
Supplement: d5nr00612k1.pdf [file d5nr00612k1.pdf]

## Supplementary Information

### Engineering hydrophobic and electrostatic interactions for selective inactivation of bacteriophages by mixed-ligand nanoparticles

Sada Raza<sup>1\*</sup>, Pumza Mente<sup>1</sup>, Bartosz Kamiński<sup>1</sup>, Bartłomiej Bończak<sup>1</sup>, Hossein Maleki-Ghaleh<sup>1</sup>, Visesh Vignesh<sup>2</sup>, Jan Paczesny<sup>1\*</sup>

<sup>1</sup>Institute of Physical Chemistry, Polish Academy of Sciences, Kasprzaka 44/52, 01-224 Warsaw, Poland

<sup>2</sup>Department of Chemical Engineering and Centre for Bioengineering and Biomedical Technologies (CBio), University of Bath, BA2 7AY Bath, UK

Corresponding authors: Jan Paczesny, Ph.D., [jpaczesny@ichf.edu.pl](mailto:jpaczesny@ichf.edu.pl) +48 22 343 2071, Sada Raza, [sraza@ichf.edu.pl](mailto:sraza@ichf.edu.pl)

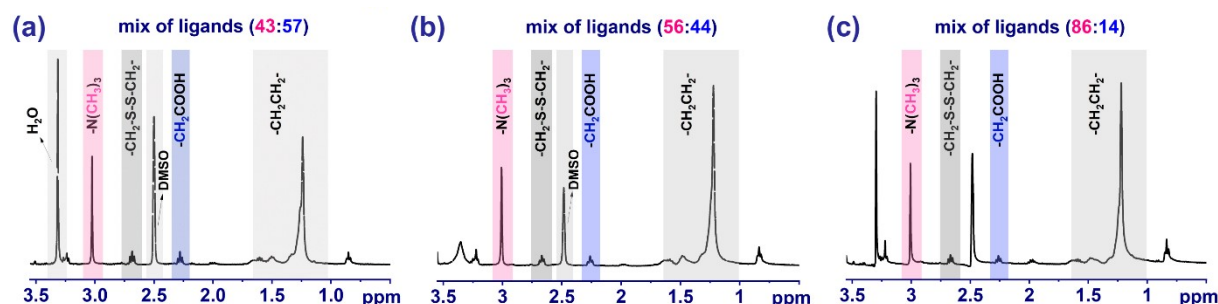

**Figure S1:** Proton NMR spectrum of the MLNPs composed of (a) 43% TMA and 57% MUA, (b) 56% TMA and 44% MUA, and (c) 86% TMA and 14% MUA.

**Table S1:** Chemical shifts of relevant H groups (s – singlet; t – triplet; q – quartet; m – multiplet)

| Type of H Group                                                         | Chemical Shift (ppm) |
|-------------------------------------------------------------------------|----------------------|
| <u>-CH<sub>2</sub></u> -N <sup>+</sup> (CH <sub>3</sub> ) <sub>3</sub>  | 3.29 – 3.21 (m)      |
| -CH <sub>2</sub> -N <sup>+</sup> ( <u>CH<sub>3</sub></u> ) <sub>3</sub> | 3.02 (s)             |
| <u>-CH<sub>2</sub></u> -SS- <u>CH<sub>2</sub></u> -                     | 2.72 – 2.65 (t)      |
| <u>-CH<sub>2</sub></u> -COOH                                            | 2.30 – 2.23 (t)      |
| <u>-CH<sub>2</sub></u> -COO <sup>-</sup>                                | 2.20 – 2.15 (t)      |
| CH <sub>2</sub> - <u>CH<sub>2</sub></u> -CH <sub>2</sub>                | 1.71 – 1.19 (m)      |
| -CH <sub>2</sub> - <u>CH<sub>3</sub></u>                                | 0.88 – 0.80 (t)      |
| <u>-CH<sub>2</sub></u> -SH                                              | 2.56 – 2.48 (q)      |
| -CH <sub>2</sub> - <u>SH</u>                                            | 2.22 – 2.17 (t)      |

**Figure S2** presents the TGA curves of nanoparticles functionalized with TMA (100%), MUA (100%), and mixed-ligand nanoparticles functionalized with TMA:MUA:DDT. As shown, Au@TMA and Au@MUA nanoparticles exhibit residual masses of 80.05 wt% and 79.15 wt% at 500 °C, respectively, with the observed mass losses attributed to the thermal degradation of TMA and MUA ligands on the nanoparticle surfaces. Moreover, mixed-ligand nanoparticles functionalized with TMA:MUA:DDT exhibit a total mass loss of 20.85 wt%, which corresponds to the degradation of TMA, MUA, and DDT ligands on the surfaces of the mixed-ligand Au nanoparticles.

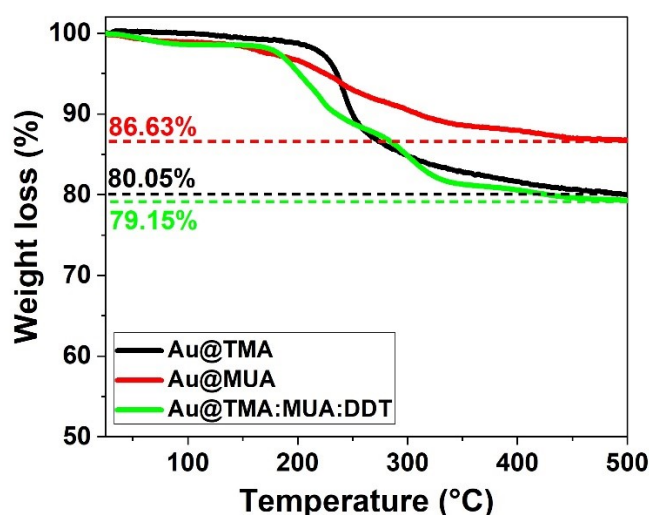

**Figure S2:** Thermogravimetric analysis of Au@TMA, Au@MUA, and Au@TMA:MUA:DDT.

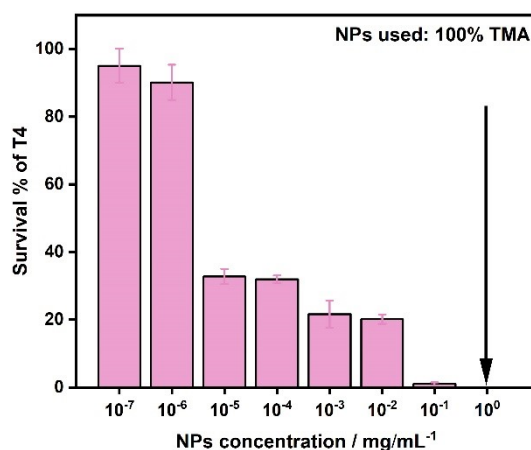

**Figure S3:** Dosage compensation of the survival % of T4 bacteriophages against 100% positive (only TMA, 100:0:0) nanoparticles. The virions were exposed to MLNPs concentrations, ranging from  $10^{-7}$  mg/mL to 1 mg/mL. The starting concentration of T4 was  $10^7$  PFU/mL.
